# Supplementary material for: Ontology-based prediction of cancer driver genes
Source: PubMed Central journal article supplement (PMC6874647; doi:10.1038/s41598-019-53454-1), 2019-11-22
Supplement: 41598_2019_53454_MOESM1_ESM.pdf [file 41598_2019_53454_MOESM1_ESM.pdf]

# Ontology-based prediction of cancer driver genes

Sara Althubaiti<sup>1,2</sup>, Andreas Karwath<sup>3,4</sup>, Ashraf Dalloc<sup>5</sup>, Adeeb Noor<sup>6</sup>, Shadi Salem Al-Khayyat<sup>7</sup>, Rolina Alwassia<sup>8</sup>, Katsuhiko Mineta<sup>1,2</sup>, Takashi Gojobori<sup>2,9</sup>, Andrew D. Beggs<sup>3</sup>, Paul N. Schofield<sup>10</sup>, Georgios V. Gkoutos<sup>3,4,11,12,13</sup>, and Robert Hoehndorf<sup>1,2,\*</sup>

<sup>1</sup>Computer, Electrical and Mathematical Science and Engineering Division, King Abdullah University of Science and Technology, Thuwal 23955, Saudi Arabia

<sup>2</sup>Computational Bioscience Research Center, King Abdullah University of Science and Technology, Thuwal 23955, Saudi Arabia

<sup>3</sup>College of Medical and Dental Sciences, Institute of Cancer and Genomic Sciences, University of Birmingham, B15 2TT, Birmingham, United Kingdom

<sup>4</sup>Institute of Translational Medicine, University Hospitals Birmingham, NHS Foundation Trust, B15 2TT, Birmingham, United Kingdom

<sup>5</sup>Centre of Excellence in Genomic Medicine Research, King Abdulaziz University, Jeddah, Saudi Arabia

<sup>6</sup>Department of Information Technology, Faculty of Computing and Information Technology, King Abdulaziz University, Jeddah 80221, Saudi Arabia

<sup>7</sup>Faculty of Medicine, King Abdulaziz University, Jeddah 21589, Saudi Arabia

<sup>8</sup>Radiation Oncology Unit, King Abdulaziz University Hospital, Jeddah, Saudi Arabia

<sup>9</sup>Biological and Environmental Science and Engineering Division, King Abdullah University of Science and Technology, Thuwal 23955, Saudi Arabia

<sup>10</sup>Department of Physiology, Development & Neuroscience, University of Cambridge, Downing Street, CB2 3EG, Cambridge, United Kingdom

<sup>11</sup>NIHR Experimental Cancer Medicine Centre, B15 2TT, Birmingham, UK

<sup>12</sup>NIHR Surgical Reconstruction and Microbiology Research Centre, B15 2TT, Birmingham, UK

<sup>13</sup>MRC Health Data Research UK (HDR UK), United Kingdom

\*robert.hoehndorf@kaust.edu.sa

Table 1: 20 different cancer types have been used

| Corresponding Class | Cancer Type                                  | Number of genes |
|---------------------|----------------------------------------------|-----------------|
| 0                   | Not identified                               | 19,893          |
| 1                   | Acute myeloid leukemia (AML)                 | 32              |
| 2                   | Bladder carcinoma (BLCA)                     | 156             |
| 3                   | Breast carcinoma (BRCA)                      | 184             |
| 4                   | Chronic lymphocytic leukemia (CLL)           | 38              |
| 5                   | Cutaneous melanoma (CM)                      | 250             |
| 6                   | Colorectal adenocarcinoma (COREAD)           | 95              |
| 7                   | Esophageal carcinoma (ESCA)                  | 98              |
| 8                   | Glioblastoma multiforme (GBM)                | 75              |
| 9                   | Hepatocarcinoma (HC)                         | 30              |
| 10                  | Head and neck squamous cell carcinoma (HNSC) | 167             |
| 11                  | Lower grade glioma (LGG)                     | 50              |
| 12                  | Lung adenocarcinoma (LUAD)                   | 181             |
| 13                  | Lung squamous cell carcinoma (LUSC)          | 147             |
| 14                  | Ovarian Carcinoma (OV)                       | 83              |
| 15                  | Prostate adenocarcinoma (PRAD)               | 88              |
| 16                  | Renal clear cell carcinoma (RCCC)            | 105             |
| 17                  | Small cell lung carcinoma (SCLC)             | 61              |
| 18                  | Stomach adenocarcinoma (STAD)                | 175             |
| 19                  | Thyroid carcinoma (THCA)                     | 32              |
| 20                  | Uterine corpus endometrioid carcinoma (ICC)  | 149             |

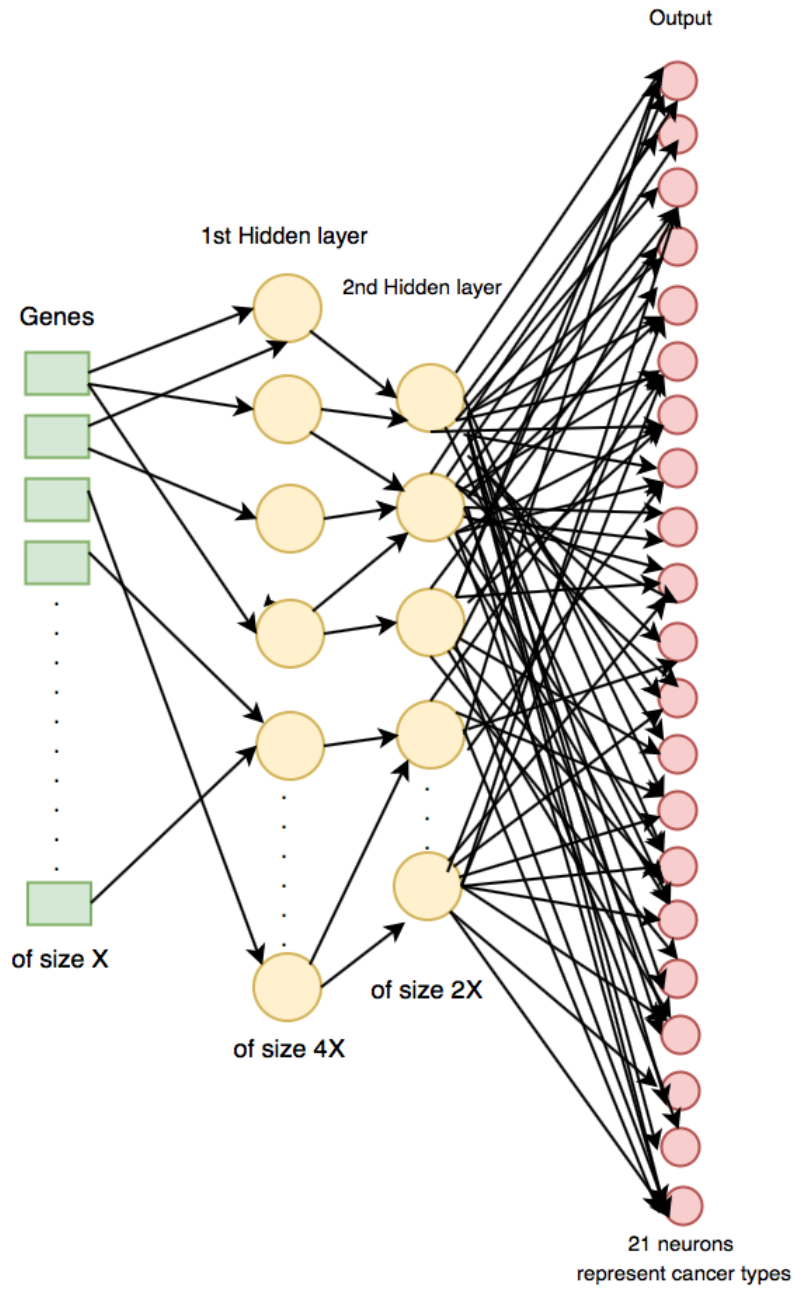

Figure 1: Neural network architecture consisting of an input layer of the embedding size  $x$  for one gene, and two hidden layers of size  $4x$  and  $2x$ , and the output layer consisting of 21 neurons for each of the 20 cancer types plus one class to classify a gene as non-driver.

Table 2: 20 different cancer types have been used

| Corresponding Class | Cancer Type                                  | Number of genes |
|---------------------|----------------------------------------------|-----------------|
| 0                   | Not identified                               | 19,893          |
| 1                   | Acute myeloid leukemia (AML)                 | 32              |
| 2                   | Bladder carcinoma (BLCA)                     | 156             |
| 3                   | Breast carcinoma (BRCA)                      | 184             |
| 4                   | Chronic lymphocytic leukemia (CLL)           | 38              |
| 5                   | Cutaneous melanoma (CM)                      | 250             |
| 6                   | Colorectal adenocarcinoma (COREAD)           | 95              |
| 7                   | Esophageal carcinoma (ESCA)                  | 98              |
| 8                   | Glioblastoma multiforme (GBM)                | 75              |
| 9                   | Hepatocarcinoma (HC)                         | 30              |
| 10                  | Head and neck squamous cell carcinoma (HNSC) | 167             |
| 11                  | Lower grade glioma (LGG)                     | 50              |
| 12                  | Lung adenocarcinoma (LUAD)                   | 181             |
| 13                  | Lung squamous cell carcinoma (LUSC)          | 147             |
| 14                  | Ovarian Carcinoma (OV)                       | 83              |
| 15                  | Prostate adenocarcinoma (PRAD)               | 88              |
| 16                  | Renal clear cell carcinoma (RCCC)            | 105             |
| 17                  | Small cell lung carcinoma (SCLC)             | 61              |
| 18                  | Stomach adenocarcinoma (STAD)                | 175             |
| 19                  | Thyroid carcinoma (THCA)                     | 32              |
| 20                  | Uterine corpus endometrioid carcinoma (ICC)  | 149             |

Table 3: Number of predicted driver genes within each cancer type

| Cancer Type | Number of predicted genes |
|-------------|---------------------------|
| AML         | 2                         |
| BLCA        | 4                         |
| BRCA        | 14                        |
| CLL         | 2                         |
| CM          | 11                        |
| COREAD      | 12                        |
| ESCA        | 3                         |
| GBM         | 4                         |
| HC          | 5                         |
| HNSC        | 7                         |
| LGG         | 1                         |
| LUAD        | 9                         |
| LUSC        | 5                         |
| OV          | 3                         |
| PRAD        | 3                         |
| RCCC        | 7                         |
| SCLC        | 4                         |
| STAD        | 5                         |
| THCA        | 7                         |
| ICC         | 11                        |

Table 4: The list of the predicted driver-genes for each cancer type.

| Cancer type    | Gene name | Number of mutations | Gene length | Mutation_Frequency |
|----------------|-----------|---------------------|-------------|--------------------|
| COREAD         | MAPK1     | 33                  | 98652       | 2989.454545        |
| HNSC           | RRAGD     | 18                  | 47661       | 2647.833333        |
| CM/LUSC        | PRKACB    | 32                  | 40800       | 1275               |
| COREAD         | STIL      | 61                  | 64009       | 1049.327869        |
| UCEC           | PKHD1     | 358                 | 366777      | 1024.51676         |
| UCEC           | ALDH1A1   | 53                  | 52656       | 993.509434         |
| BLCA           | SLC15A1   | 74                  | 68875       | 930.7432432        |
| BRCA           | TCF15     | 7                   | 6274        | 896.2857143        |
| CM             | RBP1      | 15                  | 13425       | 895                |
| CM             | SCD       | 20                  | 17817       | 890.85             |
| HC             | PEBP1     | 11                  | 9705        | 882.2727273        |
| LUSC           | MAPK6     | 55                  | 47052       | 855.4909091        |
| UCEC           | SLC9A2    | 110                 | 91817       | 834.7              |
| LUAD           | PIOD1     | 52                  | 40876       | 786.0769231        |
| STAD           | ETNK1     | 28                  | 19274       | 688.357143         |
| HNSC           | TGM3      | 71                  | 45113       | 635.3943662        |
| SCLC           | SLC12A3   | 82                  | 50644       | 617.6097561        |
| LGCG           | SULT2B1   | 39                  | 23692       | 607.4871795        |
| GBM/CM         | SULT1E1   | 33                  | 18941       | 573.960697         |
| BRCA           | PRPF19    | 30                  | 16042       | 534.7333333        |
| HC             | S100A11   | 9                   | 4530        | 503.3333333        |
| GBM            | PEX5      | 42                  | 21122       | 502.9047619        |
| CM             | TALI1     | 32                  | 15426       | 482.0625           |
| CM             | SUV39H1   | 26                  | 12283       | 472.4230769        |
| LUAD           | PKD4      | 28                  | 13117       | 468.4642857        |
| HNSC           | TFAP2B    | 63                  | 28888       | 458.5396825        |
| STAD           | PGM3      | 60                  | 27164       | 452.7333333        |
| HNSC           | OSGIN1    | 29                  | 13111       | 432.103448         |
| HC             | SNRNPB    | 21                  | 9219        | 439                |
| UCEC           | CHST6     | 50                  | 21905       | 438.1              |
| COREAD         | CERCAM    | 39                  | 16872       | 432.615385         |
| BRCA           | SCNN1G    | 79                  | 34161       | 432.4177215        |
| AML            | REM3      | 16                  | 6813        | 425.8125           |
| COREAD         | SLC28A2   | 57                  | 23705       | 415.877193         |
| RCCC           | ALG12     | 37                  | 15253       | 412.243243         |
| UCEC           | PITX3     | 28                  | 11286       | 403.0714286        |
| COREAD         | PFM1G     | 74                  | 28485       | 384.9524324        |
| CM/PRAD        | PKM       | 62                  | 23758       | 383.1935484        |
| LUSC/UCEC      | RIT1      | 35                  | 13108       | 374.5142857        |
| STAD           | RUNX1T1   | 168                 | 62714       | 373.297619         |
| COREAD         | OBSCN     | 412                 | 153121      | 371.652913         |
| COREAD         | SFTPB     | 31                  | 11425       | 368.5483871        |
| BRCA           | POU3F1    | 8                   | 2928        | 366                |
| BRCA           | CXCL12    | 23                  | 8036        | 349.3913043        |
| SCLC           | COX17     | 24                  | 7872        | 328                |
| COREAD         | ZKSCAN2   | 66                  | 21534       | 326.2727272        |
| UCEC           | SOX11     | 27                  | 8719        | 322.9259259        |
| THCA           | PIF       | 24                  | 7661        | 319.2083333        |
| PRAD/STAD/LUAD | PPP1R10   | 57                  | 16907       | 296.6140351        |
| STAD           | SRV       | 3                   | 887         | 295.6666667        |
| OV             | POLR2A    | 106                 | 30238       | 285.2641509        |
| COREAD         | SNRPD2    | 16                  | 4539        | 283.6875           |
| RCCC           | XCL1      | 20                  | 5605        | 280.25             |
| LUSC           | SLC9A5    | 85                  | 23240       | 273.411765         |
| LUAD           | PIM1      | 21                  | 5283        | 251.5714286        |
| BLCA/RCCC      | SFRP2     | 34                  | 8487        | 249.6176471        |
| AML            | SFC1      | 13                  | 42887       | 225.8109434        |
| CM             | PYCR1     | 20                  | 4854        | 242.7              |
| LUAD           | ITPKA     | 40                  | 9702        | 242.55             |
| OV             | POU3F3    | 19                  | 4506        | 237.1578947        |
| STAD           | SRMS      | 32                  | 7581        | 236.90625          |
| HNSC           | TNKS1BP1  | 110                 | 23511       | 230.1              |
| THCA           | PIGR      | 78                  | 17945       | 230.0641026        |
| BRCA           | SLC52A3   | 37                  | 8505        | 229.864865         |
| BLCA           | PLXNB1    | 112                 | 25612       | 228.6785714        |
| BRCA           | HAF1      | 54                  | 12008       | 222.3703704        |
| COREAD         | BRIS8     | 101                 | 21786       | 215.70297          |
| ESCA/SCLC      | CCL3      | 9                   | 1904        | 211.5555556        |
| HC             | ANG       | 26                  | 5414        | 208.2307692        |
| BRCA           | PROP1     | 20                  | 4008        | 200.4              |
| HC             | PGLYRP2   | 56                  | 10859       | 193.9107143        |
| THCA           | NOLC1     | 62                  | 11696       | 188.6451613        |
| CM             | LEFTY2    | 26                  | 4895        | 188.2692308        |
| CLL            | PTMS      | 25                  | 4636        | 185.44             |
| HNSC           | CCNA1     | 62                  | 10611       | 171.1451613        |
| LUAD           | SIX3      | 26                  | 4180        | 160.7692308        |
| CM             | SRF       | 59                  | 9117        | 154.5254237        |
| COREAD         | FES       | 70                  | 10731       | 153.3              |
| CLL            | MAP2K7    | 73                  | 10704       | 146.630137         |
| RCCC           | GRB7      | 51                  | 7319        | 143.5098039        |
| AML            | SFTA1     | 543                 | 76010       | 139.9815838        |
| BRCA           | CCL1      | 21                  | 2906        | 138.3809522        |
| THCA           | RXRG      | 64                  | 8428        | 131.6875           |
| PA             | FCER1G    | 32                  | 3952        | 123.5              |
| UCEC           | PCOLCE    | 51                  | 5917        | 116.019608         |
| PRAD           | MBD1      | 94                  | 10733       | 114.1808511        |
| BRCA/HNSC      | TAPBP     | 104                 | 10743       | 103.2980769        |
| LUAD           | KRT18     | 38                  | 3843        | 101.1315789        |
| UCEC           | MYH4      | 294                 | 26269       | 89.35034014        |
| LUSC           | SSTR5     | 30                  | 2674        | 89.13333333        |
| RCCC           | SPHK1     | 34                  | 2653        | 78.0294176         |
| GBM            | NES       | 113                 | 8634        | 76.40707965        |
| ESCA           | SSTR1     | 67                  | 5065        | 75.59701493        |
| RCCC           | PBX2      | 74                  | 5451        | 73.66216216        |
| LUAD           | PLP2      | 47                  | 3285        | 69.89361702        |
| ESCA           | RAG1      | 180                 | 11748       | 65.26666667        |
| COREAD         | S100A8    | 15                  | 945         | 63                 |
| UCEC           | PNMT      | 34                  | 2023        | 59.5               |
| RCCC           | FTL       | 29                  | 1571        | 54.17241379        |
| SCLC           | GLMP      | 57                  | 3003        | 52.68421053        |
| THCA           | IFNA5     | 20                  | 1039        | 61.95              |
| BRCA           | SLC1A3    | 58                  | 2943        | 50.74137931        |
| LUAD           | SOX15     | 40                  | 1991        | 49.775             |
| THCA           | EPHA10    | 100                 | 4880        | 48.8               |
| UCEC           | PFPFCAP   | 53                  | 2173        | 41                 |
| BRCA           | DAXX      | 109                 | 4458        | 40.89908257        |
| OV             | PRM1      | 13                  | 500         | 38.46153846        |
| BRCA           | FKBP1     | 45                  | 1584        | 35.2               |
| THCA           | SOD1      | 332                 | 9309        | 28.03915663        |
| GBM            | SPEG      | 224                 | 6051        | 27.01339286        |
| BLCA           | FGK2      | 96                  | 1690        | 17.60416667        |
| BRCA           | HIST1H2AC | 47                  | 546         | 11.61702128        |

Table 5: List of the rare mutations within the predicted head and neck squamous cell carcinoma driver genes. The mutations are filtered by minor allele frequency (MAF) in ExAC of  $<0.01$ .

| Gene Name | Mutations  | Number of patients share this mutation | ExAC_Freq            | SIFT score | Polyploidy2 score | Mutation/Traster score | Mutation/Assessor score | FATHMM score | VEST3 score | Uncoded/Raw CADD | PHEB/Assaid CADD | Type         | Prediction    |
|-----------|------------|----------------------------------------|----------------------|------------|-------------------|------------------------|-------------------------|--------------|-------------|------------------|------------------|--------------|---------------|
| TGMB      | rs1499834  | 1                                      | 0.007                | 0.84       | 0.001             | 1                      | 0.345                   | -0.16        | 0.06        | 0.429            | 6.861            | heterozygous | tolerated     |
| TGMB      | rs20291064 | 1                                      | $0.6 \times 10^{-4}$ | 0.63       | 0.306             | 1                      | 1.965                   | 1.52         | 0.618       | 4.825            | 24.8             | heterozygous | deleterious   |
| TGMB      | rs20884628 | 1                                      | 0.004                | 0.595      | 0.002             | 1                      | 0.35                    | -0.72        | 0.046       | -1.28            | 0.064            | heterozygous | tolerated     |
| OSGIN1    | rs18964906 | 1                                      | 0.007                | 0.83       | 0.038             | 0.997                  | 0.9                     | 1.34         | 0.65        | 1.214            | 11.82            | heterozygous | tolerated     |
| TNKS1BP1  | rs17043370 | 1                                      | 0                    | 0.209      | 0.042             | 1                      | 0.345                   | 1.61         | 0.106       | 0.415            | 6.743            | heterozygous | tolerated     |
| TNKS1BP1  | rs15924714 | 3                                      | 0.0039               | 0.607      | 0.593             | 0.628                  | 0.695                   | 0.98         | 0.463       | 4.029            | 24.6             | heterozygous | deleterious   |
| TNKS1BP1  | rs1935831  | 2                                      | 0.002                | 0.121      | 0.017             | 1                      | 1.61                    | 0.97         | 0.189       | 1.967            | 16               | heterozygous | deleterious   |
| TNKS1BP1  | rs18119115 | 1                                      | 0                    | 0.535      | 0.025             | 1                      | 0.41                    | 1.45         | 0.136       | 0.7              | 8.826            | heterozygous | tolerated     |
| CCNA1     | rs11365598 | 3                                      | 0.002                | 0.306      | 0.001             | 1                      | 0                       | 2.30         | 0.133       | 0.061            | 2.574            | heterozygous | tolerated     |
| TAPBP     | rs14583721 | 3                                      | 0.062                | 0          | 0.002             | 1                      | 0                       | 1.32         | 0.101       | 3.795            | 21.4             | heterozygous | cannot assess |

Table 6: List of the rare mutations within the predicted colorectal driver genes. The mutations are filtered by minor allele frequency (MAF) in ExAC of  $<0.01$ .

| Gene name | Mutation    | Number of patients share this mutation | ExAC_Freq            | Polyploidy2 score | SIFT score | Mutation/Assessor score | Mutation/Traster score | FATHMM score | VEST3 score | Uncoded/Raw CADD | PHEB/Assaid CADD | Type         | Prediction    |
|-----------|-------------|----------------------------------------|----------------------|-------------------|------------|-------------------------|------------------------|--------------|-------------|------------------|------------------|--------------|---------------|
| FES       | rs70149832  | 2                                      | 0                    | 0.888             | 0.003      | 1.205                   | 1                      | -1.67        | 0.532       | 3.61940          | 25.5             | heterozygous | deleterious   |
| OBSCN     | rs17742814  | 2                                      | $0.2 \times 10^{-4}$ | 0.889             | 0.03       | 2.61                    | 1                      | -0.27        | 0.588       | 2.92577          | 23.5             | heterozygous | deleterious   |
| OBSCN     | rs20172133  | 2                                      | $0.8 \times 10^{-4}$ | -                 | -          | -                       | 1                      | -            | -           | 6.69590          | 36               | heterozygous | cannot assess |
| OBSCN     | rs77316465  | 2                                      | 0                    | 0.001             | 0.525      | 0.02                    | 1                      | 0.62         | 0.131       | -0.36978         | 0.224            | heterozygous | deleterious   |
| OBSCN     | rs12057309  | 2                                      | $0.5 \times 10^{-4}$ | 0.757             | 0          | 1.78                    | 1                      | 1.07         | 0.388       | 3.47849          | 25               | heterozygous | deleterious   |
| OBSCN     | rs17063825  | 2                                      | 0.0012               | 0.989             | 0.022      | 0.885                   | 0.867                  | -0.21        | 0.317       | 3.50269          | 25.1             | heterozygous | deleterious   |
| OBSCN     | rs77074639  | 2                                      | 0                    | 0.023             | 0.026      | 0.95                    | 0.999                  | -0.01        | 0.662       | 3.23219          | 24.3             | heterozygous | deleterious   |
| OBSCN     | rs17018010  | 2                                      | 0                    | 0.029             | 0.218      | 1.565                   | 1                      | -0.23        | 0.186       | 0.44124          | 8.744            | heterozygous | tolerated     |
| OBSCN     | rs14924863  | 2                                      | 0                    | 0.877             | 0.215      | 0.655                   | 1                      | -0.28        | 0.196       | 2.19006          | 21.3             | heterozygous | tolerated     |
| OBSCN     | rs18802184  | 2                                      | 0.0015               | 0.105             | 0.139      | 0.69                    | 1                      | -0.21        | 0.258       | 0.680169         | 10.93            | heterozygous | deleterious   |
| OBSCN     | rs16957131  | 2                                      | 0                    | 0.904             | 0.085      | 2.285                   | 1                      | -0.55        | 0.177       | -0.01965         | 1.480            | heterozygous | deleterious   |
| OBSCN     | rs201854668 | 2                                      | 0.00124              | 0.999             | 0.088      | 2.045                   | 1                      | -0.2         | 0.416       | 7.34876          | 38               | heterozygous | deleterious   |
| OBSCN     | rs18831451  | 2                                      | $0.8 \times 10^{-4}$ | 0.974             | 0.051      | 2.465                   | 1                      | 0.29         | 0.31        | 3.29916          | 24.4             | heterozygous | deleterious   |
| OBSCN     | rs1012841   | 2                                      | $0.8 \times 10^{-4}$ | -                 | 0.687      | -                       | 1                      | 1.72         | 0.025       | -0.02017         | 2.226            | heterozygous | cannot assess |
| OBSCN     | rs6202832   | 2                                      | 0.00709              | 1                 | 0          | 3.14                    | 1                      | 2.1          | 0.664       | 3.530120         | 25.2             | heterozygous | deleterious   |
| OBSCN     | rs19560126  | 2                                      | 0.0022               | 0.156             | 0.071      | 2.305                   | 1                      | -0.3         | 0.499       | 2.536169         | 22.7             | heterozygous | deleterious   |

Table 7: List of overlapping predicted driver genes with the current COSMIC confirmed cancer driver genes.

| Gene Name |
|-----------|
| MAPK1     |
| STIL      |
| ETNK1     |
| TAL1      |
| RUNX1T1   |
| PIM1      |
| FES       |
| DAXX      |

Table 8: Prediction performances of applying OPA2Vec on the combined ontology using different embedding sizes and minimum counts evaluated by AUC. AUC is reported on a 20% test set randomly chosen from the positives and negatives.

| Parameters setting                                          | F-score       | AUC           |
|-------------------------------------------------------------|---------------|---------------|
| embedding size = 50, window size = 5, min-count = 0         | 89.06%        | 91.13%        |
| embedding size = 100, window size = 5, min-count = 0        | 91.15%        | 93.87%        |
| embedding size = 200, window size = 5, min-count = 0        | 90.90%        | 91.49%        |
| embedding size = 300, window size = 5, min-count = 0        | 91.33%        | 92.33%        |
| embedding size = 50, window size = 5, min-count = 5         | 88.42%        | 90.81%        |
| <b>embedding size = 100, window size = 5, min-count = 5</b> | <b>92.57%</b> | <b>94.28%</b> |
| embedding size = 200, window size = 5, min-count = 5        | 91.11%        | 91.37%        |
| embedding size = 300, window size = 5, min-count = 5        | 91.68%        | 92.74%        |
